# Supplementary material for: Seasonal Changes in Serum Metabolites in Multiple Sclerosis Relapse
Source: MDPI journal article supplement (doi:10.3390/ijms24043542), 2023-02-10
Supplement: s1 [file s1]

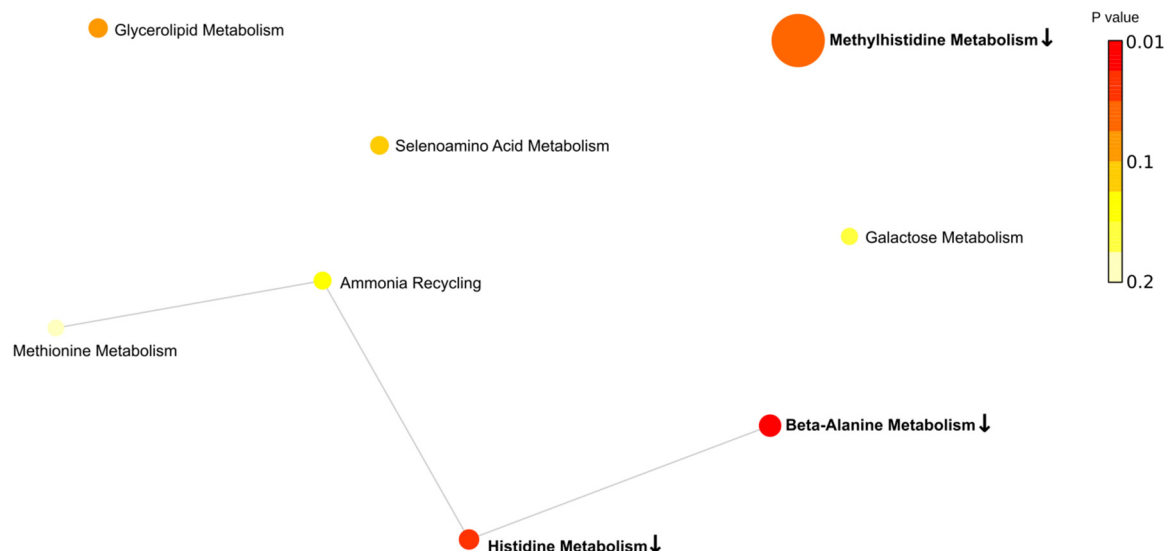

**Figure S1.** Metabolic pathways affected both spring and fall MS. Bold indicates significantly enriched pathways ( $p < 0.05$ ). ↓—decreased serum level of metabolites included in the metabolic pathway in MS compared to control. Each node represents a metabolite set with its color based on its  $p$  value and its size based on fold enrichment. Two metabolite sets are connected by an edge if the number of their shared metabolites is over 25% of the total number of their combined metabolite sets. The yellow to red color gradient and larger size of the circle indicate lower  $p$  value.

**Table S1.** List of metabolites significantly changed in MS group compared to controls.

|    | MS fall vs.<br>CTRL fall |                                 | MS winter vs.<br>CTRL winter |                         | MS spring vs.<br>CTRL spring |                                 | MS summer vs.<br>CTRL summer |                         |
|----|--------------------------|---------------------------------|------------------------------|-------------------------|------------------------------|---------------------------------|------------------------------|-------------------------|
|    | Decreased (59)           | Increased (6)                   | Decreased (12)               | Increased (18)          | Decreased (21)               | Upregulated (7)                 | Decreased (10)               | Increased (8)           |
| 1  | Coenzyme Q9              | Ceramide(d18:1/16:0)            | DHC(18:1/24:0)*              | Ceramide(d18:1/22:0 OH) | DHC(18:1/24:0)*              | Ceramide(d18:1/24:0)            | DHC(18:1/24:0)*              | Ceramide(d18:1/22:0 OH) |
| 2  | Cer(d18:1/12:0)          | Ceramide(d18:1/18:1 OH)         | Vitamin D3                   | Ceramide(d18:1/24:0)    | Vitamin D3                   | Ceramide(d18:1/16:0)            | Vitamin D3                   | Ceramide(d18:1/24:0)    |
| 3  | PG (16:0/16:0)           | Ceramide(d18:1/18:1)            | N-Acetylserine               | Ceramide(d18:1/16:0)    | Riboflavin                   | Ceramide(d18:1/18:1 OH)         | Hexacosanoic acid*           | Ceramide(d18:1/18:1 OH) |
| 4  | DHC(18:1/24:0)*          | Niacinamide                     | 5-Hydroxy-L-tryptophan       | Cer(d18:1/12:0)         | Selenomethionine             | Cytidine monophosphate          | L-Lactic acid                | Cytidine monophosphate  |
| 5  | Ureidopropionic acid     | Sphingosine*                    | Hexacosanoic acid*           | Ceramide(d18:1/18:1)    | Chenodeoxycholic acid        | Sphingosine*                    | Gentisic acid*               | Sphingosine*            |
| 6  | 2 Aminocaprylic acid     | Deoxyguanosine 5'-monophosphate | 4,5-Dihydroorotic acid       | Glucosamine             | Hexacosanoic acid*           | Deoxyguanosine                  | O-Phosphorylethanolamine     | L-Arginine              |
| 7  | N-Acetylserine           |                                 | Allantoin                    | Alpha-Tocopherol        | Allantoin                    | Deoxyguanosine 5'-monophosphate | CDP-choline                  | Deoxyguanosine          |
| 8  | S-Adenosylhomocysteine   |                                 | L-Lactic acid                | Biotin                  | 4-Aminohippuric acid         |                                 | Docosahexaenoic acid(DHA)    | Guanosine               |
| 9  | L-Arginine               |                                 | 4-Hydroxyphenyl pyruvic acid | Sphingosine*            | Agmatine                     |                                 | DL-O-Phosphoserine           |                         |
| 10 | L-Asparagine             |                                 | Gentisic acid*               | Eicosapentaenoic acid   | Glycerol                     |                                 | Gamma-Aminobutyric acid      |                         |
| 11 | Selenomethionine         |                                 | Glycylproline                | Linoleic acid           | Gentisic acid*               |                                 |                              |                         |

|    |                             |                 |                       |                           |
|----|-----------------------------|-----------------|-----------------------|---------------------------|
| 12 | PE(18:0/16:1(9Z))           | Methylguanidine | Deoxyguanosine        | Plasmalogen(p18:0/22:6)   |
| 13 | Hexacosanoic acid*          |                 | Quinolinic acid       | LysoPE(P-18:0/0:0)        |
| 14 | 4,5-Dihydroorotic acid      |                 | Homovanillic acid     | Docosahexaenoic acid(DHA) |
| 15 | Glycolic acid               |                 | N-Methyltyramine      | Hydroxykynurenine         |
| 16 | Anandamide                  |                 | 2-Arachidonylglycerol | Glycylproline             |
| 17 | 4-Hydroxyphenylpyruvic acid |                 | PE(20:1(11Z)/16:0)    | Methionine sulfoxide      |
| 18 | Glyceric acid               |                 | PC(18:0/18:2(9Z,12Z)) | Gamma-Aminobutyric acid   |
| 19 | N-Acetylputrescine          |                 |                       | Carnosine                 |
| 20 | 4-Aminohippuric acid        |                 |                       | L-Histidine               |
| 21 | Agmatine                    |                 |                       | Methylguanidine           |
| 22 | Homovanillic acid           |                 |                       |                           |
| 23 | Mevalonic acid              |                 |                       |                           |
| 24 | Glycerol                    |                 |                       |                           |
| 25 | Normetanephrine             |                 |                       |                           |
| 26 | Glucose                     |                 |                       |                           |
| 27 | Myo-Inositol                |                 |                       |                           |
| 28 | Gluconolactone              |                 |                       |                           |
| 29 | Glucose 6-phosphate         |                 |                       |                           |
| 30 | Ascorbic acid               |                 |                       |                           |
| 31 | Gentisic acid*              |                 |                       |                           |
| 32 | 2-Keto-L-gluconate          |                 |                       |                           |
| 33 | N-a-Acetyl-L-arginine       |                 |                       |                           |
| 34 | Plasmalogen(p18:0/22:6)     |                 |                       |                           |
| 35 | LysoPE(P-18:0/0:0)          |                 |                       |                           |
| 36 | CDP-choline                 |                 |                       |                           |
| 37 | Docosahexaenoic acid(DHA)   |                 |                       |                           |
| 38 | L-Homoserine                |                 |                       |                           |
| 39 | Hydroxykynurenine           |                 |                       |                           |
| 40 | L-Phenylalanine             |                 |                       |                           |
| 41 | L-Leucine                   |                 |                       |                           |
| 42 | L-Isoleucine                |                 |                       |                           |
| 43 | L-Valine                    |                 |                       |                           |
| 44 | Glycylproline               |                 |                       |                           |
| 45 | Methionine sulfoxide        |                 |                       |                           |
| 46 | O-Acetylserine              |                 |                       |                           |
| 47 | Dimethyl-L-arginine         |                 |                       |                           |
| 48 | Gamma-Aminobutyric acid     |                 |                       |                           |
| 49 | L-Asparagine                |                 |                       |                           |
| 50 | Homocysteine                |                 |                       |                           |
| 51 | Methylcysteine              |                 |                       |                           |
| 52 | Ornithine                   |                 |                       |                           |
| 53 | L-Kynurenine                |                 |                       |                           |
| 54 | Carnosine                   |                 |                       |                           |
| 55 | L-Histidine                 |                 |                       |                           |
| 56 | L-Glutamic acid             |                 |                       |                           |
| 57 | L-Cystathionine             |                 |                       |                           |

|    |                |
|----|----------------|
| 58 | Hypotaurine    |
| 59 | Picolinic acid |
